# Supplementary material for: Imaging CAR T cell therapy with PSMA-targeted positron emission tomography
Source: PubMed Central journal article supplement — Sci Adv. 2019 Jul 3;5(7):eaaw5096. doi: 10.1126/sciadv.aaw5096 (PMC6609218; doi:10.1126/sciadv.aaw5096), 2019-07-03
Supplement: aaw5096_SM.pdf [file aaw5096_SM.pdf]

## Supplementary Materials for

### **Imaging CAR T cell therapy with PSMA-targeted positron emission tomography**

Il Minn, David J. Huss, Hye-Hyun Ahn, Tamara M. Chinn, Andrew Park, Jon Jones, Mary Brummet, Steven P. Rowe, Polina Sysa-Shah, Yong Du, Hyam I. Levitsky, Martin G. Pomper\*

\*Corresponding author. Email: mpomper@jhmi.edu

Published 3 July 2019, *Sci. Adv.* **5**, eaaw5096 (2019)  
DOI: 10.1126/sciadv.aaw5096

#### **This PDF file includes:**

Fig. S1. DCFPyL does not affect CD19-tPSMA<sup>(N9del)</sup> CAR T cells in vitro.

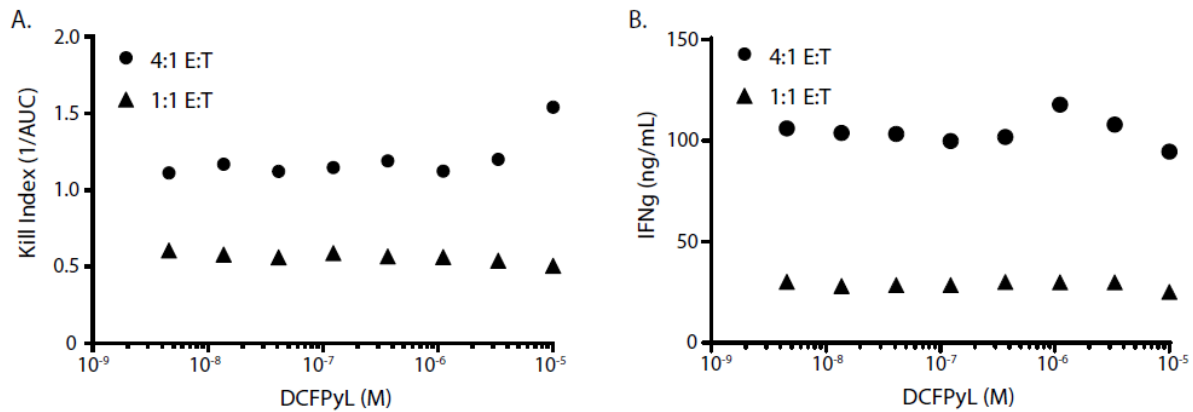

**Fig. S1. DCFPyL does not affect CD19-tPSMA<sup>(N9del)</sup> CAR T cells in vitro.**

CD19-tPSMA<sup>(N9del)</sup> CAR-T cells were incubated with increasing concentrations of DCFPyL. (A) A kill index was calculated; (B) IFN $\gamma$  production at 24 h post-activation on K562-CD19 target cells. Data are representative of two independent experiments with two independent donors.

#### Abbreviations

CAR: chimeric antigen receptor

PET: positron emission tomography

SPECT: single photon emission computed tomography

MR: magnetic resonance

HSV1-TK: herpes simplex virus type 1 thymidine kinase

fLuc: firefly luciferase

SSTR2: type 2 somatostatin receptor

[<sup>68</sup>Ga]DOTATATE: <sup>68</sup>Ga-DOTA-DPhe1, Tyr3-octreotate

[<sup>18</sup>F]DCFPyL: 2-(3-{carboxy-5-[(6-[(<sup>18</sup>F]fluoro-pyridine-3-carbonyl)-amino]-pentyl]-ureido)-pentanedioic acid
